# Supplementary material for: Fibrocytes are increased in lung and peripheral blood of patients with idiopathic pulmonary fibrosis
Source: PubMed Central journal article supplement (PMC5946532; doi:10.1186/s12931-018-0798-8), 2018-05-10

A

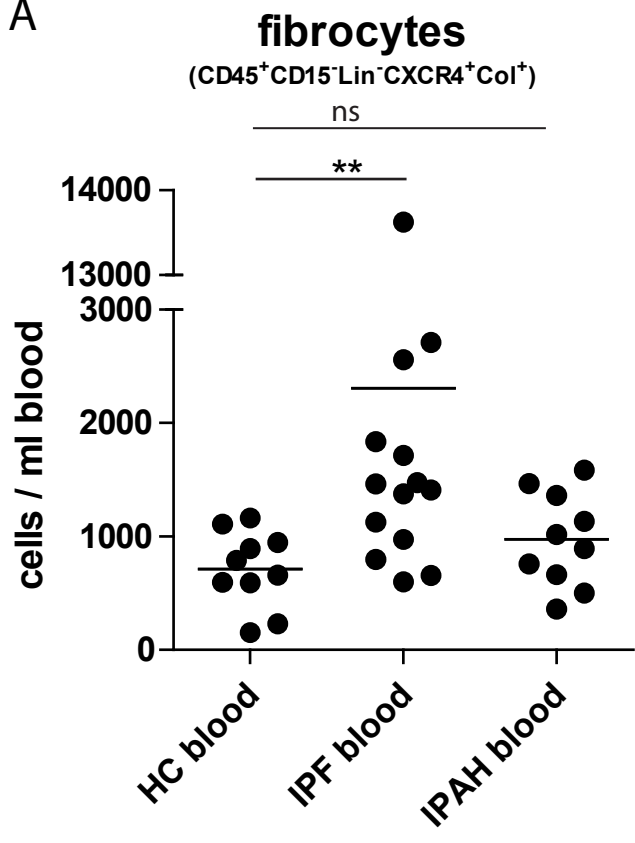

Supplement: 12931_2018_798_MOESM5_ESM.pdf [file 12931_2018_798_MOESM5_ESM.pdf]
